# Supplementary material for: Genomic and Transcriptomic Approaches Provide a Predictive Framework for Sesquiterpenes Biosynthesis in Desarmillaria tabescens CPCC 401429
Source: MDPI journal article supplement (doi:10.3390/jof9040481), 2023-04-17
Supplement: s1 [file s1]

# Genomic and Transcriptomic Approaches Provide a Predictive Framework for Sesquiterpenes Biosynthesis in *Desarmillaria tabescens* CPCC 401429

Tao Zhang <sup>1,\*</sup>, Jianjv Feng <sup>1</sup>, Wenni He <sup>1</sup>, Xiaoting Rong <sup>1</sup>, Hui Lv <sup>1</sup>, Jun Li <sup>1</sup>, Xinxin Li <sup>1</sup>, Hao Wang <sup>1</sup>, Lu Wang <sup>1</sup>, Lixin Zhang <sup>2,\*</sup> and Liyan Yu <sup>1,\*</sup>

<sup>1</sup> Institute of Medicinal Biotechnology, Chinese Academy of Medical Sciences & Peking Union Medical College, Beijing 100050, China

<sup>2</sup> State Key Laboratory of Bioreactor Engineering, East China University of Science & Technology, Shanghai 200237, China

\* Correspondence: zhangt218@hotmail.com (T.Z.); lxzhang@ecust.edu.cn (L.Z.); yly@cpcc.ac.cn (L.Y.)

## TABLE OF CONTENTS

| Contents                                                                                                                                                                    | Page   |
|-----------------------------------------------------------------------------------------------------------------------------------------------------------------------------|--------|
| Table S1. Summary statistics and STSs encoding genes of the sequenced <i>Armillaria</i> genomes. BUSCO scores indicate the completeness of genomic assemblies.              | S3     |
| Table S2. Gene distribution of encoding CAZymes in different mushroom.                                                                                                      | S3     |
| Table S3. List of upregulated DEGs coding glycosyl hydrolase family proteins.                                                                                               | S4-5   |
| Table S4. List of upregulated DEGs coding transporter proteins.                                                                                                             | S5-6   |
| Table S5. List of upregulated DEGs coding fruiting body formation proteins.                                                                                                 | S6     |
| Table S6. List of upregulated DEGs coding SMs biosynthetic or related proteins.                                                                                             | S6-7   |
| Figure S1. HPLC analysis of metabolite profiles obtained from the PDB, F1 and YMEG fermentation broth of <i>D. tabescens</i> CPCC 401429.                                   | S8     |
| Figures S2. RNA samples extracted from the <i>D. tabescens</i> CPCC 401429.                                                                                                 | S8     |
| Figure S3. Heatmap of three samples including PDB, F1, and YMEG fermentation broth obtained by RNA-seq of <i>D. tabescens</i> CPCC 401429.                                  | S9     |
| Figure S4. Heatmap of cytochrome P450s coding genes in three samples including PDB, F1, and YMEG fermentation broth obtained by RNA-seq of <i>D. tabescens</i> CPCC 401429. | S10    |
| Sequences 1. <i>tef-1α</i> gene sequences of CPCC 401429 and sequenced <i>Armillaria</i> spp.                                                                               | S10-12 |
| Sequences 2. Codon optimized sequences of gene <i>DtSTS9</i> and <i>DtSTS10</i> .                                                                                           | S12    |

**Table S1** Summary statistics and STSs encoding genes of the sequenced *Armillaria* genomes. BUSCO scores indicate the completeness of genomic assemblies.

| organisms             |               | Assembly size (Mb) | GC%   | BUSCO(%) | Number of genes | No. of STSs encoding genes |
|-----------------------|---------------|--------------------|-------|----------|-----------------|----------------------------|
| <i>D. tabescens</i>   | CPCC          | 50.36              | 47.14 | 92.4%    | 15,145          | 12                         |
| 401429                |               |                    |       |          |                 |                            |
| <i>A. altimontana</i> | 837-10        | 73.74              | 47.8  | -        | -               | 13                         |
| <i>A. borealis</i>    | FPL87.14 v1.0 | 67.0               | 47.30 | 94.7%    | 21,969          | 9                          |
| <i>A. cepistipes</i>  | B5            | 75.52              | 47.71 | 97.9%    | 23,461          | 15                         |
| <i>A. gallica</i>     | 012m          | 87.31              | 47.38 | 99.8%    | 25,704          | 11                         |
| <i>A. ostoyae</i>     | C18/9         | 60.11              | 48.33 | 99.2%    | 22,705          | 12                         |
| <i>A. fuscipes</i>    | CMW2740       | 52.98              | 47.68 | -        | -               | 6                          |
| <i>A. solidipes</i>   | 28-4          | 55.74              | 48.26 | 99.8%    | 20,811          | 12                         |
| <i>A. mellea</i>      | DSM 3731      | 58.35              | 47.26 | -        | 14,473          | 17                         |

**Table S2** Gene distribution of encoding CAZymes in different mushroom.

| CAZymes                  | Total | GH  | GT  | AA  | CE  | PL | CBM |
|--------------------------|-------|-----|-----|-----|-----|----|-----|
| <i>D. tabescens</i>      | 509   | 199 | 52  | 145 | 78  | 20 | 15  |
| <i>A. gallica</i> 012m   | 824   | 331 | 100 | 170 | 142 | 25 | 82  |
| <i>A. gallica</i> Ar21-2 | 826   | 318 | 106 | 178 | 144 | 25 | 79  |
| <i>A. cepistipes</i> B5  | 810   | 329 | 97  | 181 | 136 | 27 | 66  |
| <i>A. ostoyae</i> C18/9  | 764   | 300 | 92  | 156 | 135 | 31 | 71  |
| <i>A. solidipes</i> 28-4 | 789   | 302 | 93  | 158 | 150 | 29 | 79  |
| <i>A. bisporus</i>       | 374   | 172 | 52  | 94  | 33  | 12 | 11  |
| <i>P. ostreatus</i>      | 512   | 226 | 65  | 139 | 27  | 26 | 29  |
| <i>C. cinerea</i>        | 475   | 188 | 72  | 129 | 47  | 18 | 21  |
| <i>L. edodes</i>         | 449   | 241 | 71  | 86  | 32  | 11 | 14  |
| <i>S. commune</i>        | 469   | 247 | 71  | 85  | 37  | 19 | 11  |
| <i>L. bicolor</i>        | 302   | 151 | 73  | 53  | 9   | 7  | 9   |

**Table S3** List of upregulated DEGs coding glycosyl hydrolase family proteins.

| Gene ID   | Gene function                                | Log <sub>2</sub> FC (F1/PDB) | Log <sub>2</sub> FC (YMEG/PDB) |
|-----------|----------------------------------------------|------------------------------|--------------------------------|
| gene00130 | glycoside hydrolase/deacetylase              | 1.636756628                  | -0.24983613056                 |
| gene00131 | rhamnogalacturonase A                        | 4.665469633                  | 0.403603111928                 |
| gene00135 | glucose-6-phosphate 1-dehydrogenase          | 1.16434665                   | -0.402050248184                |
| gene00175 | family 9 glycosyl hydrolase                  | 1.415373529                  | -1.43526141879                 |
| gene00229 | glycoside hydrolase family 16 protein        | 1.074303532                  | -1.28005015301                 |
| gene00519 | glycoside hydrolase family 74 protein        | 1.665210136                  | -0.16562418118                 |
| gene00520 | oligoxylloglucan reducing cellobiohydrolase  | 2.273960444                  | 0.966423593918                 |
| gene00541 | probable beta-glucosidase L                  | 1.451961391                  | -0.576197601669                |
| gene00817 | glycoside hydrolase family 28 protein        | 7.052520724                  | 0.227696775757                 |
| gene01658 | glycosylase                                  | 1.847567231                  | -0.224425714737                |
| gene01670 | glycoside hydrolase family 27 protein        | 1.479700705                  | 1.833577335951                 |
| gene02382 | pectate lyase                                | 1.041890636                  | 0.639574063733                 |
| gene02423 | glycoside hydrolase family 16 protein        | 4.299574866                  | -0.359545773518                |
| gene03225 | glucoamylase                                 | 2.906825176                  | 2.46158203245                  |
| gene03324 | carbohydrate esterase family 9 protein       | 1.271900837                  | n.d.                           |
| gene03447 | endoglucanase-4                              | 1.273689527                  | -0.462099968279                |
| gene03604 | Ribose-phosphate pyrophosphokinase 2         | 1.040864385                  | 2.3643945261582                |
| gene03806 | pectin lyase-like protein                    | 1.505296299                  | -0.684519003802                |
| gene04166 | glycoside hydrolase family 71 protein        | 1.286959958                  | 0.142683544611                 |
| gene04379 | polysaccharide lyase family 4 protein        | 2.015460952                  | -0.971117686027                |
| gene04526 | alpha-mannosidase                            | 1.632250566                  | n.d.                           |
| gene04696 | carbohydrate esterase family 8 protein       | 1.498912527                  | n.d.                           |
| gene05077 | six-hairpin glycosidase                      | 1.601189581                  | 0.438353901693                 |
| gene05090 | glycoside hydrolase family 61 protein        | 1.833444422                  | n.d.                           |
| gene05226 | endoglucanase V-like protein                 | 5.404548172                  | 0.47066171422                  |
| gene05485 | glycosyl hydrolase family 61.5               | 3.000837207                  | 1.544308808                    |
| gene05670 | glycoside hydrolase family 31 protein        | 1.020283078                  | n.d.                           |
| gene05738 | actin depolymerizing protein                 | 1.15140835                   | 0.589961832524                 |
| gene05851 | glycoside hydrolase family 47 protein        | 1.152642492                  | -0.477325632583                |
| gene06185 | putative alpha-amylase                       | 1.5216045                    | n.d.                           |
| gene06203 | endopolygalacturonase 2 precursor            | 6.858761819                  | n.d.                           |
| gene06251 | glycoside hydrolase family 3 protein         | 1.840956907                  | -2.15529261378                 |
| gene06654 | chitin deacetylase 1                         | 1.918996284                  | -0.226218783527                |
| gene06655 | carbohydrate-binding module family 1 protein | 2.183041591                  | -0.0480090313808               |
| gene06795 | putative endo-xylogalacturonan hydrolase A   | 2.729302612                  | n.d.                           |
| gene07115 | UDP-glucosyl transferase family protein      | 1.104721778                  | n.d.                           |
| gene07786 | glycoside hydrolase family 76 protein        | 1.980960039                  | 0.816473014841                 |
| gene08058 | related to glucosidase I                     | 1.442980532                  | 0.737688716368                 |
| gene08221 | glucoamylase                                 | 2.042472538                  | n.d.                           |
| gene10048 | UDP-Glycosyltransferase/glycogen             | 1.712228706                  | -1.35174136141                 |

|           |                                                               |             |                 |
|-----------|---------------------------------------------------------------|-------------|-----------------|
|           | phosphorylase                                                 |             |                 |
| gene10174 | D-xylulose 5-phosphate/D-fructose 6-phosphate phosphoketolase | 3.291012092 | -0.600961614303 |
| gene10709 | chitin deacetylase                                            | 3.285631957 | 0.161556650717  |
| gene12159 | glycoside hydrolase family 31 protein                         | 1.020283078 | 0.296458040146  |
| gene12854 | glycosyl hydrolase                                            | 1.34702831  | 2.512871564     |
| gene13258 | endo-1,4-beta-xylanase F3                                     | 1.96373657  | -2.07022390984  |
| gene13557 | related to endoglucanase c                                    | 1.755185551 | -2.729915213    |
| gene13739 | arabinosidase                                                 | 2.646105281 | 0.024530051578  |
| gene14722 | glycoside hydrolase family 5 protein                          | 1.524154588 | n.d.            |
| gene15034 | glycoside hydrolase family 16 protein                         | 5.889010501 | n.d.            |
| gene15199 | galactose mutarotase-like protein                             | 1.459160227 | n.d.            |

Note: n.d., not detected.

**Table S4** List of upregulated DEGs coding transporter proteins.

| Gene ID   | Gene function                              | Log <sub>2</sub> FC (F1/PDB) | Log <sub>2</sub> FC (YMEG/PDB) |
|-----------|--------------------------------------------|------------------------------|--------------------------------|
| gene00481 | OPT oligopeptide transporter               | 1.315189935                  | -1.67657778735                 |
| gene00524 | amino acid permease                        | 2.185697379                  | -0.223010432582                |
| gene00834 | MFS amino acid permease                    | 1.003368506                  | -0.187934914113                |
| gene01023 | MFS general substrate transporter          | 1.560018823                  | -0.313974306574                |
| gene01036 | MFS general substrate transporter          | 2.577165695                  | n.d.                           |
| gene01134 | SNQ2-ABC transporter                       | 1.642307153                  | -1.80955609239                 |
| gene01539 | solute symporter family transporter        | 1.305348845                  | -1.2174245891                  |
| gene01824 | MFS general substrate transporter          | 1.000520889                  | n.d.                           |
| gene01859 | hexose transporter                         | 1.825479678                  | -0.0254543640102               |
| gene03247 | transport protein particle complex subunit | 1.119939801                  | 0.226832905239                 |
| gene03473 | MFS monosaccharide transporter             | 2.243139826                  | -0.326748456729                |
| gene03810 | MFS general substrate transporter          | 2.230924629                  | -1.30308460336                 |
| gene03944 | MFS polyamine transporter                  | 2.482901816                  | 0.171818896389                 |
| gene04550 | putative efflux transporter                | 1.573662488                  | -0.212288143801                |
| gene04627 | MFS general substrate transporter          | 2.098731599                  | n.d.                           |
| gene04646 | MFS general substrate transporter          | 1.603902816                  | 1.85595869964                  |
| gene04659 | MFS general substrate transporter          | 1.603902816                  | 1.32958635746                  |
| gene05358 | MFS general substrate transporter          | 1.850421432                  | -0.176487798557                |
| gene05935 | general substrate transporter              | 3.551250496                  | -1.0161930619                  |
| gene05943 | general substrate transporter              | 2.001012795                  | n.d.                           |
| gene06166 | auxin efflux carrier                       | 1.670233934                  | -0.520980883513                |
| gene06180 | MFS general substrate transporter          | 1.662828577                  | -2.01602477653                 |
| gene06524 | MFS general substrate transporter          | 1.223765827                  | n.d.                           |
| gene06585 | MFS general substrate transporter          | 1.267488912                  | -0.200056674124                |
| gene06739 | drug: H <sup>+</sup> antiporter            | 3.503668675                  | -0.0322001201191               |
| gene07162 | related to sugar transport protein STP1    | 1.238781649                  | -0.0565513942988               |
| gene07723 | MFS general substrate transporter          | 1.894546831                  | n.d.                           |
| gene09360 | MFS quinate transporter QutD               | 1.160447189                  | -1.46948239886                 |

|           |                                     |             |                  |
|-----------|-------------------------------------|-------------|------------------|
| gene09452 | general substrate transporter       | 1.481599665 | n.d.             |
| gene09983 | probable ABC1 transport protein     | 6.48375099  | -1.14141533      |
| gene10135 | MFS general substrate transporter   | 1.641874348 | -3.51779830611   |
| gene10495 | vacuolar amino acid permease        | 1.465755153 | -0.485536693732  |
| gene11126 | MFS general substrate transporter   | 3.274520412 | n.d.             |
| gene11655 | MFS general substrate transporter   | 1.042300098 | -3.83093668498   |
| gene11789 | related to sugar transporter STL1   | 1.226849589 | -2.02504197514   |
| gene12821 | sodium/hydrogen exchanger           | 1.011451095 | -0.0789032760406 |
| gene12938 | major facilitator superfamily MFS-1 | 1.2687358   | -0.259974067384  |
| gene13044 | MFS general substrate transporter   | 1.059909857 | 4.20185185       |
| gene13210 | MFS general substrate transporter   | 1.290812977 | -0.380129337395  |
| gene13907 | ABC transporter                     | 1.172319797 | 1.929918115      |
| gene13947 | amino acid transporter              | 1.278509527 | -1.652118207     |
| gene13949 | probable ABC1 transport protein     | 1.071407599 | -0.59830699228   |
| gene14251 | MFS transporter                     | 3.718459472 | n.d.             |
| gene14269 | MFS general substrate transporter   | 1.573732731 | 0.529174012607   |
| gene14271 | MFS general substrate transporter   | 1.541892783 | 1.158300235      |
| gene14844 | ABC transporter                     | 1.471831588 | n.d.             |

Note: n.d, not detected.

**Table S5** List of upregulated DEGs coding fruiting body formation proteins.

| Gene ID   | Gene function                         | Log <sub>2</sub> FC (F1/PDB) | Log <sub>2</sub> FC (YMEG/PDB) |
|-----------|---------------------------------------|------------------------------|--------------------------------|
| gene04243 | related to Fruiting body protein SC3  | 5.340951801                  | 0.594373716203                 |
| gene04245 | fungal hydrophobin                    | 3.82962318                   | 0.989459600761                 |
| gene04246 | related to Fruiting body protein SC1  | 2.506056434                  | -0.751128867326                |
| gene04247 | hydrophobin-domain-containing protein | 2.105011016                  | 0.0779214304858                |
| gene04324 | fungal hydrophobin                    | 4.160970852                  | n.d.                           |
| gene04692 | hydrophobin-251                       | 6.831734789                  | -1.696259492                   |
| gene04697 | related to Hydrophobin-3              | 4.307517909                  | 0.153202922897                 |
| gene04699 | related to Hydrophobin-3              | 7.754287488                  | -1.604504295                   |
| gene04706 | hydrophobin-263                       | 7.778137784                  | -0.206645682457                |
| gene04710 | hydrophobin-domain-containing protein | 9.852301707                  | 2.117760549                    |
| gene04712 | fungal hydrophobin                    | 8.724713452                  | -5.83793974                    |
| gene04715 | type 1 hydrophobin                    | 2.92780199                   | 1.113142042                    |
| gene04718 | type 1 hydrophobin                    | 2.92780199                   | -0.921029753151                |
| gene04721 | fungal hydrophobin                    | 8.724713452                  | 2.157708128                    |
| gene04723 | hydrophobin-domain-containing protein | 9.852301707                  | -1.64757255525                 |
| gene04914 | related to Fruiting body protein SC1  | 5.150848003                  | -0.373881660221                |
| gene04915 | fungal hydrophobin                    | 1.4075292                    | 1.151989125                    |
| gene07174 | hydrophobin                           | 1.388678251                  | -0.970695756838                |

Note: n.d, not detected.

**Table S6** List of upregulated DEGs coding SMs biosynthetic or related proteins.

| Gene ID   | Gene function                      | Log <sub>2</sub> FC (F1/PDB) | Log <sub>2</sub> FC (YMEG/PDB) |
|-----------|------------------------------------|------------------------------|--------------------------------|
| gene00493 | acetyl-CoA synthetase-like protein | 3.065823293                  | 0.218816302527                 |

|           |                                            |             |                  |
|-----------|--------------------------------------------|-------------|------------------|
| gene01032 | acetyl-CoA synthetase-like protein         | 5.555017062 | n.d.             |
| gene01869 | related to fusarubin cluster-monooxygenase | 2.329064949 | 1.011694285      |
| gene02330 | acetyl-CoA synthetase-like protein         | 3.541431146 | -0.638692151918  |
| gene02835 | uncharacterized protein ARMOST_10340       | 1.085551392 | 0.00170375424054 |
| gene02836 | induced alcohol dehydrogenase Bli-4        | 4.026315383 | -0.699697933376  |
| gene02837 | NAD(P)-binding protein                     | 2.067797132 | n.d.             |
| gene02838 | Orsellinic acid synthase ArmB              | 2.514735172 | n.d.             |
| gene02842 | uncharacterized protein ARMOST_13668       | 2.281776349 | 1.346017439      |
| gene02843 | alcohol oxidase                            | 2.702336574 | 1.424562353      |
| gene02844 | O-methylsterigmatocystin oxidoreductase    | 4.301261384 | -0.713820992469  |
| gene02845 | terpenoid synthase                         | 3.864488643 | n.d.             |
| gene02846 | cytochrome P450                            | 7.930682994 | 0.992385846421   |
| gene02853 | cytochrome P450                            | 8.427293813 | -3.127413831     |
| gene04818 | related to coenzyme a synthetase           | 2.499394555 | 0.34610485054    |
| gene07626 | terpene synthase                           | 1.394308283 | 0.0301949917736  |
| gene08450 | putative polyketide synthase               | 3.597752426 | 0.573053316724   |
| gene08841 | anthranilate synthase component 2          | 1.246161844 | -0.507713697504  |
| gene11200 | clavamate synthase-like protein            | 2.486362036 | 1.466150257      |
| gene11245 | thiazole biosynthetic enzyme               | 3.612534404 | 0.305425494396   |
| gene12094 | clavamate synthase-like protein            | 3.40409459  | 1.48291766       |
| gene12096 | clavamate synthase-like protein            | 3.156497267 | 0.286457153163   |
| gene12939 | alpha-muurolene synthase                   | 1.978606026 | -0.650620180304  |

Note: n.d, not detected.

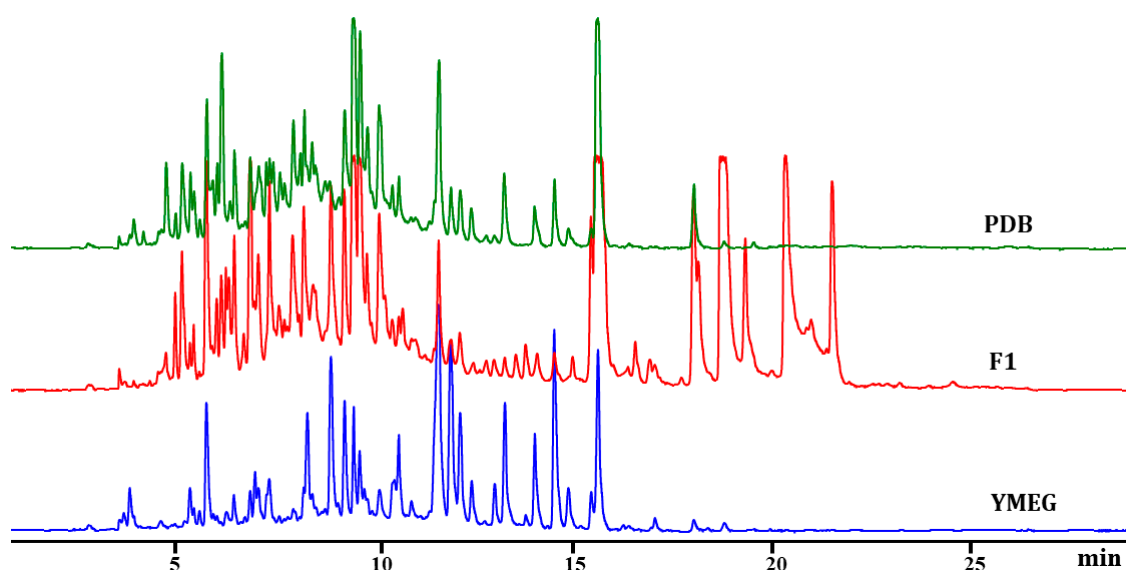

**Figure S1.** HPLC analysis of metabolite profiles obtained from the PDB, F1 and YMEG fermentation broth of *D. tabescens* CPCC 401429. The three samples including PDB, F1, and YMEG broth with *Armillaria* cultures were extracted with ethyl acetate two times. Each extract was prepared and analyzed according to the conditions described elsewhere.

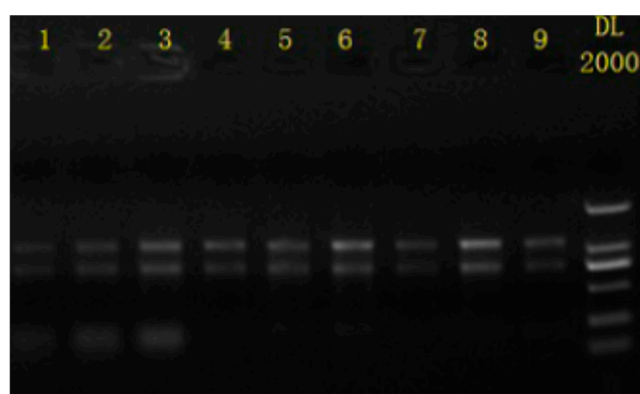

**Figure S2.** RNA samples extracted from the *D. tabescens* CPCC 401429. M, DNA marker; Lanes 1, 2, and 3 are RNA samples isolated from PDB broth; Lanes 4, 5, and 6 are RNA samples isolated from F1 broth; Lanes 7, 8, and 9 are RNA samples isolated from YMEG broth.



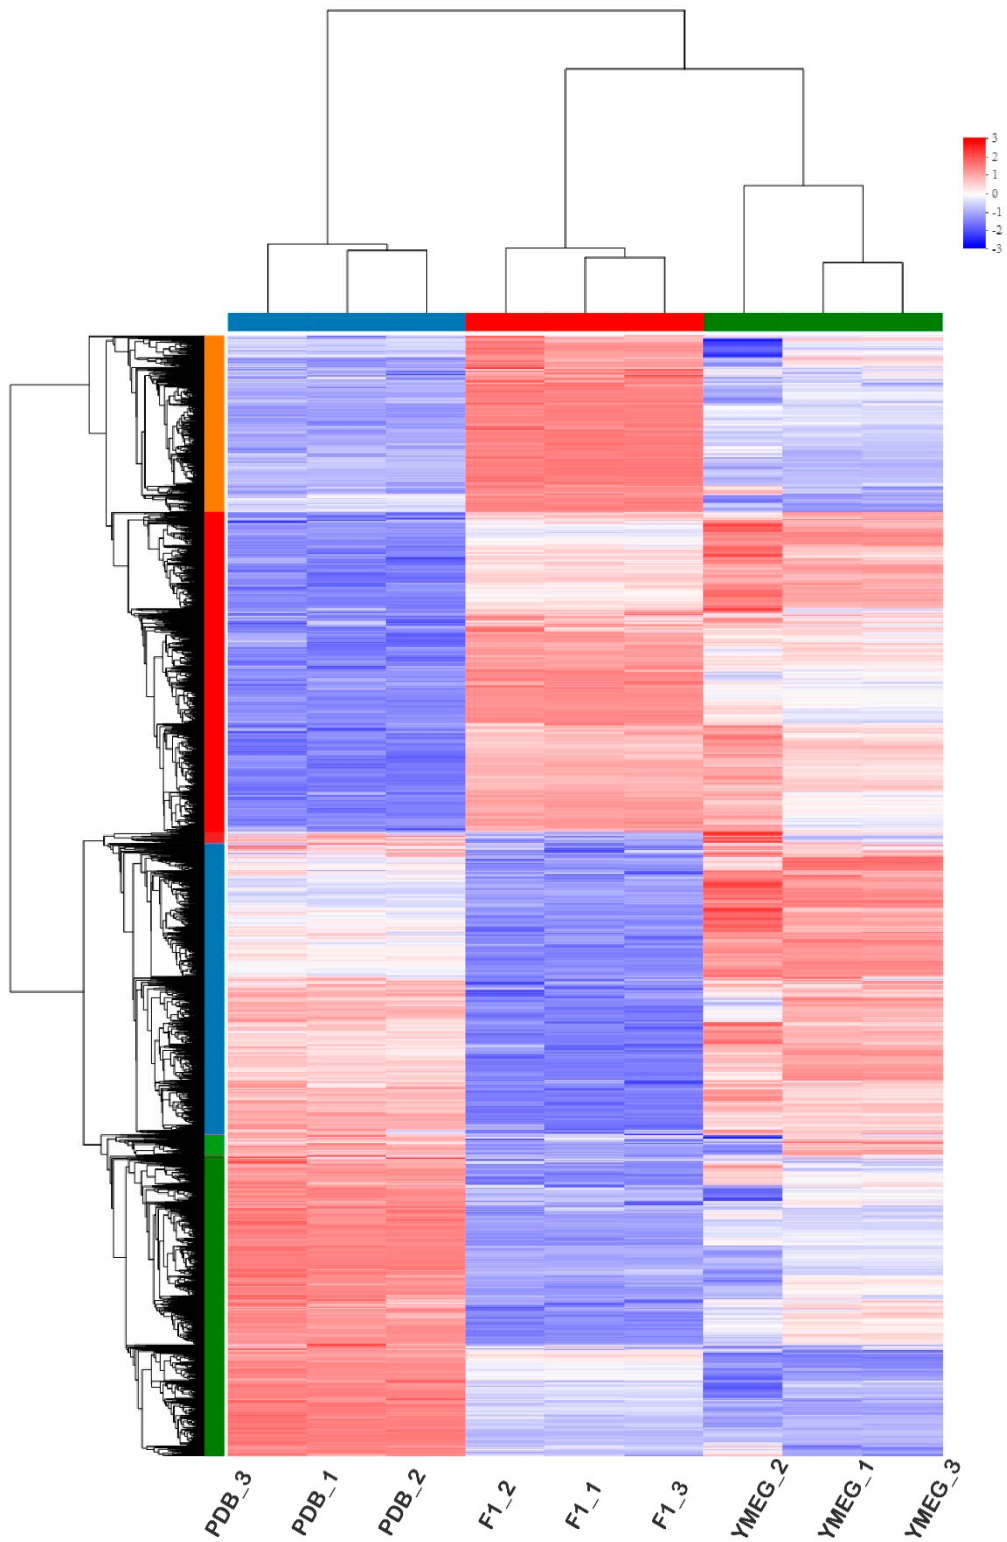

**Figure S3.** Heatmap of three samples including PDB, F1, and YMEG fermentation broth obtained by RNA-seq of *D. tabescens* CPCC 401429. PDB-1, PDB-2, and PDB-3 are samples of PDB fermentation broth; F1-1, F1-2, and F1-3 are samples of F1 fermentation broth; YMEG-1, YMEG-2, and YMEG-3 are samples of YMEG fermentation broth.

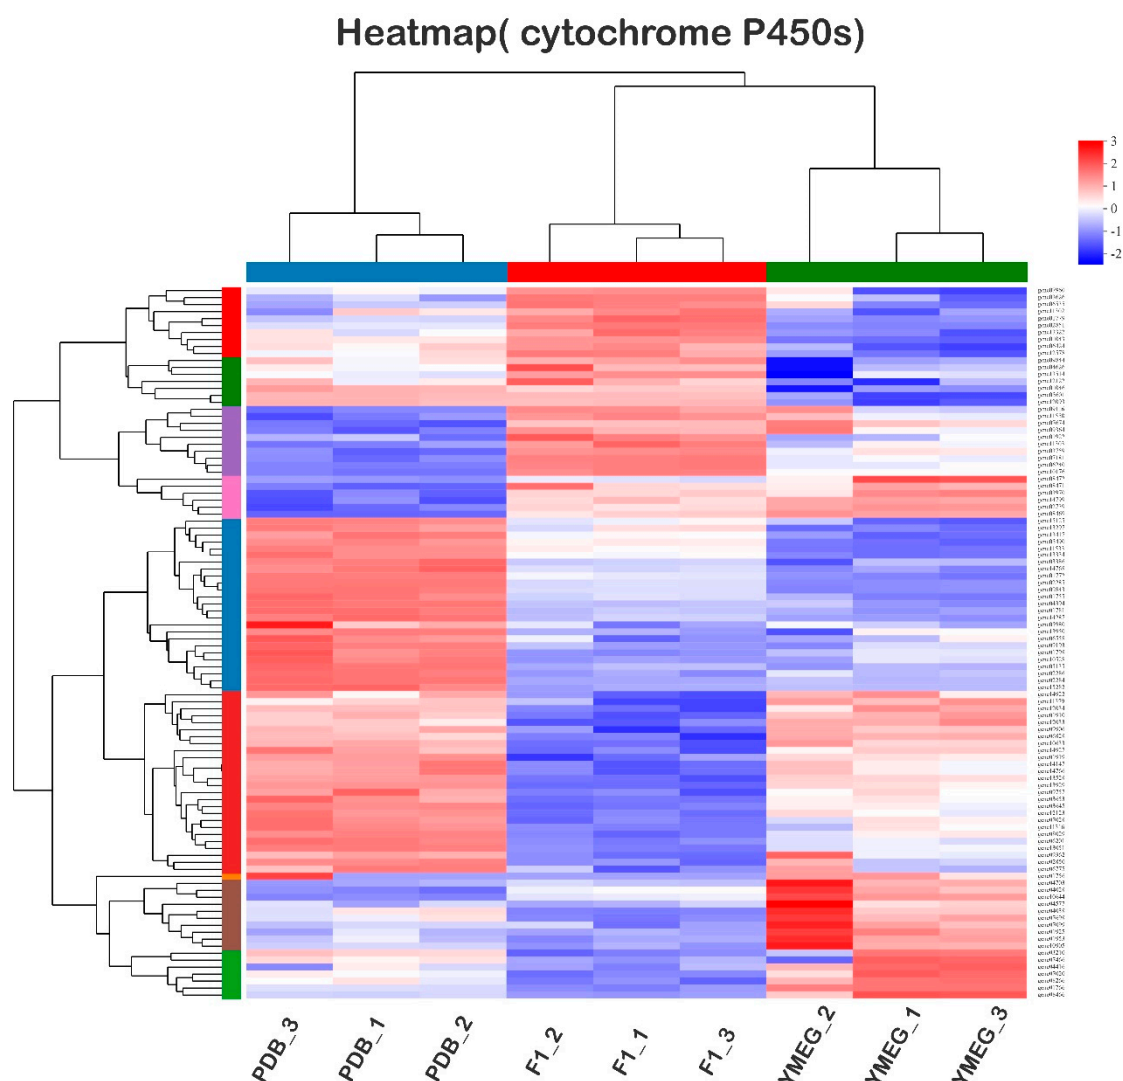

**Figure S4.** Heatmap of cytochrome P450s coding genes in three samples including PDB, F1, and YMEG fermentation broth obtained by RNA-seq of *D. tabescens* CPCC 401429. PDB-1, PDB-2, and PDB-3 are samples of PDB fermentation broth; F1-1, F1-2, and F1-3 are samples of F1 fermentation broth; YMEG-1, YMEG-2, and YMEG-3 are samples of YMEG fermentation broth.

**Sequences 1.** *tef-1α* gene sequences of CPCC 401429 and sequenced *Armillaria* spp.

> *tef-1α* gene (*Desarmillaria tabescens* CPCC 401429)

```
AGAACATGATCACTGGTACCTCCCAAGCTGATTGTGCCATCCTTATCATTGCTGGTGGTACTGGTGAAT
TCGAAGCCGGTATCTCCAAGGATGGTCAGACCCGAGAGCACGCCCTTCTTGCCTTCACTCTTGGTGTC
AGGCAGCTCATTGTTGCCGTCAACAAGATGGACACCACCAAGGTACGAACCCTACCCCATCGCTTTTT
CTTTCGCGAAGTCCGACATTTGTCTTAGTGAGTGAGGACCGATTCAACGAAATCGTCAAGGAAACCT
CCACCTTCATCAAGAAGGTCGGCTACAACCCCAAATCTGTTGCTTTCGTCCCCATCTCTGGATGGCAGC
GTGACAACATGTTGGAGGAGTCCGCCAAGTAAGTCATTACCATATTATGAGCGATGCGGCGGCTTAAC
GTTATTGAAAGCATGCCATGGTACAAGGGCTGGACGAAGGAGACCAAGGCCGGTGTCTGTCGAAGGGCA
AGACTCTCCTCGATGCTATTGATGCCATTGAGCCCCCTGTCCGACCCTCCGACAAGCCTCTCCGTCTTC
CTCTCCAGGATGTCTACAAAAT
```

//

> *tef-1α* gene (*Armillaria cepistipes* B5)

```
AGAACATGATCACCGGTACCTCCAGGCTGATTGTGCCATTCTCATTATCGCTGGTGGAACTGGTGAGT
TCGAAGCCGGTATCTCCAAGGACGGTCAGACCCGAGAGCACGCCCTCCTTGCCTTCAACCCTCGGTGTC
AGGCAGCTCATTGTGCGTGTCAACAAGATGGACACCACCAAGGTACGAGATCTACTGTTTTACTTTTTT
```

CCTTAGGCATATCTGACTGGTATCTCAGTGGAGCGAGGACCGGTTCAACGAAATCGTCAAGGAAACCT  
CCACCTTCATCAAGAAGGTCGGCTACAACCCCAAGGCCGTTGCGTTCGTCCCCATCTCTGGATGGCAC  
GGTGATAACATGTTGGAGGAGTCCCCCAAGTAAGTCCCTTACCCAACTATGACCAGGGCTGCTTCTTA  
ATGTTCTCTATAGCATGCCATGGTACAAGGGCTGGACCAAGGAGACCAAGGCCGGTGTCTGTCAGGGC  
AAGACTCTCCTCGATGCCATTGACGCCATTGAGCCCCCTGTCCGTCCCTCCGACAAGCCTCTCCGTCTC  
CCTCTCCAGGATGTCTACAAAAT

//

> **tef-1 $\alpha$  gene (*A. fuscipes* CMW2740)**

AGAACATGATCACCAGGTACCTCCCAGGCTGATTGTGCCATTCTCATCATCGCTGGTGGAACCTGGTGAGT  
TCGAAGCCGGTATCTCCAAGGACGGACAGACCCGAGAGCATGCCCTCCTTGCCTTCACCCCTCGGTGTC  
AGGCAGCTTATCGTTGCCGTCAACAAGATGGACACTACTAAGGTACACGATTCTCTGTTTCATCCTTTC  
TTTGGCTAATCTCATTTTGAATTTAGTGGAGCGAGGACCGATTCAACGAAATTGTCAAGGAAACCTCTA  
CCTTCATCAAGAAGGTCGGCTATAACCCCAAGGCTGTGCTTTTCGTCCCCATCTCTGGATGGCACGGTG  
ATAACATGTTGGAGGAGTCCGTCAAGTAAGCTTACATCCGACTATGATCTATGATTAATGGTAGATCTTG  
ACCTTCTCTGTAGCATGCCCTGGTACAAGGGCTGGACCAAGGAGACCAAGGCCGGTGTCTGTCAGGGC  
CAAGACTCTCCTTGATGCCATCGACGCTATTGAGCCCCCTGTTCGTCCCTCCGACAAGCCTCTCCGTCT  
CCCTCTCCAGGATGTTTACAAAAT

//

> **tef-1 $\alpha$  gene (*A. gallica* 012m)**

AGAACATGATCACTGGTACCTCCCAGGCTGATTGTGCCATCCTCATCATCGCTGGTGGAACCTGGTGAGT  
TCGAGGCCGGTATCTCCAAGGACGGTCAGACCCGAGAGCACGCCCTCCTTGCCTTCACCCCTCGGTGTC  
AGGCAGCTCATTGTGCGCGTCAACAAGATGGACACCACCAAGGTACGAGATCTGCTGCTTTGCCTTTT  
GTTTAGCCAAATCTGACTGTTATCTCAGTGGAGTGAGGACCGGTTCAACGAAATCGTCAAGGAAACCT  
CTACCTTCATCAAGAAGGTCGGCTACAACCCCAAGGCCGTTGCTTTTCGTCCCCATCTCTGGATGGCAC  
GGTGACAACATGTTGGAGGAGTCCGCCAAGTAAGTCTTTACCCAGCTATGATCAGTGCTGTTTCTTAAC  
GTTCTCTGTAGCATGCCATGGTACAAGGGCTGGACCAAGGAGACCAAGGCTGGTGTCTGTCAGGGCA  
AGACTCTCCTCGATGCCATTGACGCCATTGAGCCCCCTGTCCGTCCCTCCGACAAGCCTCTCCGTCTCC  
CTCTCCAGGATGTCTACAAAAT

//

> **tef-1 $\alpha$  gene (*A. gallica* Ar21-2)**

AGAACATGATCACCAGGTACCTCCCAGGCTGATTGTGCCATTCTCATCATCGCTGGTGGAACCTGGTGAGT  
TCGAAGCTGGTATCTCCAAGGACGGTCAGACCCGAGAACACGCCCTCCTTGCCTTCACCCCTCGGTGTC  
AGGCAGCTCATTGTGCGCGTCAACAAGATGGACACCACCAAGGTACGAGATCTGTTGCTTTGCCTTGT  
GTTTAGCCAAATCTAACTGTTATCTCAGTGGAGCGAGGACCGGTTCAACGAAATTGTCAAGGAAACCT  
CCACCTTCATCAAGAAGGTCGGCTACAACCCCAAGGCCGTTGCTTTTCGTCCCCATCTCTGGATGGCAC  
GGTGATAACATGTTGGAGGAGTCCGCCAAGTAAGTCTTTACCCAACTATGATCAGTGCTGCCTCTTAAC  
GTGTTTTGTAGCATGCCATGGTACAAGGGCTGGACCAAGGAGACCAAGGCCGGTGTCTGTTAAGGGCA  
AGACTCTCCTCGATGCCATTGACGCCATTGAGCCCCCTGTCCGTCCCTCCGACAAGCCTCTCCGTCTCC  
CTCTCCAGGATGTCTACAAAAT

//

> **tef-1 $\alpha$  gene (*A. mellea* DSM 3731)**

AGAACATGATCACCAGGTACCTCCCAGGCTGATTGTGCCATTCTCATCATCGCTGGTGGAACCTGGTGAGT  
TCGAAGCCGGTATCTCCAAGGACGGGCAGACCCGAGAGCACGCCCTCCTTGCCTTCACCCCTCGGTGT  
CAGGCAGCTCATTGTGCGCGTCAACAAGATGGACACCACCAAGGTACAGGATCTGCTGTTTTCAGTTTT  
TCTTTAGTCAAATCTGATTGTTATCTCAGTGGAGCGAGGACCGATTCAACGAAATCGTCAAGGAAACC  
TCTACCTTCATCAAGAAGGTCGGTTACAACCCCAAGGCTGTTGCTTTTCGTCCCCATCTCTGGATGGCAC  
GGTGATAACATGTTGGAGGAGTCCGCCAAGTACGTCCTTACTTAACTATGATCCGTACTGAGTCTTAAC  
GTTCTCTGTAGCATGCCATGGTACAAGGGCTGGACCAAGGAGAGTAAGGCTGGTGTCTGCCAAAGGCA  
AGACTCTCCTCGATGCCATTGACGCCATTGAACCCCTGTTCGTCCCTCCGACAAGCCTCTCCGTCTTC  
CTCTCCAGGATGTCTACAAAAT

//

> **tef-1 $\alpha$  gene (*A. ostoyae* C18/9)**

AGAACATGATCACTGGTACCTCCCAGGCTGATTGTGCCATTCTCATCATCGCTGGTGGAACCTGGTGAAT  
TTGAAGCCGGTATTTCCAAGGACGGCCAGACTCGAGAGCACGCCCTCCTTGCCTTCACCCCTGGTGTC  
AGGCAGCTCATCGTCGCCGTCAACAAGATGGACACCACCAAGGTACGAGATCTATCGTTTTACCTTTTA  
CCTTAGGCCAAATCTGACTGTTATCTCAGTGGAGCGAGGACCGGTTCAACGAAATCGTCAAGGAAACTT  
CCACCTTCATCAAGAAGGTCGGCTACAACCCCAAGGCCGTTGCTTTTCGTCCCCATCTCTGGATGGCAC

GGTGATAACATGTTGGAGGAGTCCGCCAAGTAAGTCCTTACCTAAGTATGACCAGTGCTGCCTCTTAAC  
GTTCTCTGTAGCATGCCATGGTACAAGGGCTGGACCAAGGAGACCAAGGCCGGTGTCTGCAAGGGCA  
AGACTCTCTCGATGCCATTGACGCCATTGAGCCCCCTGTCCGTCCCTCCGACAAGCCTCTCCGTCTCC  
CTCTCCAGGATGTCTACAAAAT

//

> **tef-1 $\alpha$  gene (*A. solidipes* 28-4)**

AGAACATGATCACTGGTACCTCCCAGGCTGATTGTGCCATTCTCATCATCGCTGGTGAACTGGTGAGT  
TCGAAGCCGGTATTTCCAAGGACGGCCAGACCCGAGAGCATGCCCTCCTTGCCTTCACCTCGGTGTC  
AGGCAGCTCATCGTCGCCGTCAACAAAATGGACACCACCAAGGTACGAGATCTACTGTTTTACCTTTT  
TCCTTAGGCAAATCTGACTGTCTCAGTGGAGCGAGGACCGGTTCAACGAAATCGTCAAGGAAAC  
CTCCACCTTCATCAAGAAGGTCGGCTACAACCCCAAGGCTGTTGCTTTCGTCCCCATCTCTGGATGGC  
ACGGTGATAACATGTTGGAGGAATCCGCCAAGTAAGTCCCTTACCCAACATGACCAGTGCTGGCTCT  
TAACGTGCTCTGTAGTATGCCATGGTACAAGGGCTGGACCAAGGAGACTAAGGCTGGTGTCTGCAAGG  
GCAAGACTCTCCTCGATGCCATTGACGCCATTGAGCCCCCTGTCCGTCCCTCCGACAAGCCTCTCCGT  
CTCCCTCTCCAGGATGTCTACAAAAT

//

> **tef-1 $\alpha$  gene (*A. altimontana* 837-10)**

TTCATCAAGAACATGATCACCGGTACCTCCCAGGCTGATTGTGCTATTCTCATCATCGCTGGTGAACT  
GGTGAGTTTCGAAGCCGGTATCTCCAAGGACGGTCAGACCCGAGAGCACGCCCTCCTTGCCTTCACCC  
TCGGTGTGAGGCAGCTCATTGTGCGCGTCAACAAGATGGACACCACCAAGGTATGAGATCTCTGCTTT  
GCCTTTTGTGTTAGCCAAATCTGACTGTTATCTCAGTGGAGCGAGGACCGGTTCAACGAAATCGTCAAG  
GAAACCTCCACCTTCATCAAGAAGGTCGGCTACAACCCCAAGGCTGTTGCTTTCGTTCCTCATCTCTGG  
ATGGCACGGTGATAACATGTTGGAGGAGTCCGCTAAGTAAGTCTTTACCCAACATGATCAGTACTGCC  
TCTTAACGTTCTCTGTAGCATGCCATGGTACAAGGGCTGGACCAGGGATACCAAGGCCGGTGCCGTCA  
AGGGTAAGACTCTCCTCGATGCCATTGACGCCATTGAGCCCCCTGTCCGTCCCTCCGACAAGCCTCTC  
CGTCTCCCTCTCCAGGATGTCTACAAAAT

//

**Sequences 2.** Codon optimized sequences of gene *DtSTS9* and *DtSTS10*.

> ***DtSTS9***

ATGACTCTATCTACAGCAACCAGACCTACTAGCACCTACTCATTAGCTGGCAGGCTTAAAACTCGTAAA  
CCAAAGTCAGCTTCCGAAGAAATAGGTGATACTATAAGGGCGTTCCTACACCATTTCGACACTACAAA  
CCTTCCTTCAATCTGGGATCCACCTTAGAAGCACTATGCTTAGCAGAGGCAAAAAGAAGAGGATACA  
GCATAGATGTCTTAAGACCATATTTAACCTTGGGTCTAAACATTACAGTTTCTGCTTACCATCATATTGAC  
AACGCAAACGTAAAGGTCTTTATTGCTTCTTTTGTATGTTTTTGATATATTTAGATGATGTATACCCGGA  
CGATAGTGATGCATTAGGGGGAGTCCAGATTTTACCCGTCACCTTCACGTCTAGCGAAAAGCAATCTTC  
AAAGATCCTTAACGACTTAGCTGATTTGTTAACGGAATCTTCTCAACACTTTGGTAAGGTCACAGCGG  
ACTTTATTGTCTACTCTGCTCTGAAGTTTATTACAGGGCTAATATTAGAGGTGCAAAGCAAGCAAGAAA  
GCACCCAGAGAGTTGAAGAATACGCCATTTTCTTGAGAGAGCAATGTGGATTGGCTGAAGCATTCTGCT  
ATGTTTATCTTCCCAAGAGACGTTTCTTCCATCTGTATATCCAAGCTTTGCCTTCTATGAGAGATTTTAT  
AGATTTTCGGAACGACATACTTTCTTTCTACAAGGAAGAATGTTCTGGAGATACTAACAATTTCAATTC  
CCTACTAGCACAGGCTAGATCTGCACCAAAGAACCAAGTGTTAAGGTACGTAGCAACACAATGTTTAG  
AGTCTATGAACGTGCTTTGAGAATTTGTCTCCACATCAAGAGGCCTATTTAGCTTTTGAAGAATTTA  
CCGACGGATACCTAGCCTTACATTTAGGCATGAAGAGATACAGGTTGTCAGAACTGGGCTAG

//

> ***DtSTS10***

ATGACTTTAAGCACCTCAACGACAAGAACAAGAAGATGTATTAGACGTAGAGATATGCCATCCTGGAC  
ATCTGCATTATCAAGTTTAGCAGGTCACCTGTTGGCTTTGAAACCAAGACATGCTAGCGAAGAAGTAG  
GTGATACAATACTGTCTTTTAGACCATTTCGACACCTCCAACCTGCCATCTATTTGGGACCCGTCATT  
GCAAGCTTTATGTCTAGTAGAAGCTGAAAGACGTGGTTACTCCGTAGAAGTGTTAAAGCCTTACTTAGT  
CTTGGGATTGAACATAACAACCTGCTGCGTATCATTACATCGACGATACAAACGTTAAATGTTCAATTTCT  
TTCTTTTGTATGTTCTTAATATACTTGGACGACGTTTACCCAGACGATTCTGATGCATTAGGGGGTGTTC  
CAGACTTCACCAGGAGATTCACATCTTCCGAAAAACAGTCCTCAAAGATTCTGAATGACTTAGCTGAC  
TTATTGACAGAGTCTTCACAACACTTCGGAAAAGTTACTGCCGATTTATCGTTTCATAGTGCTTTAAAG  
TTTATTACTGGTTTAATATTGGAAGTGCAATCTAAGTTCTGAACCCACTCATAGAATAGAAGAATACGCCA  
TCTTTTGTGCTGAACAGTGTGGTTTAGCTGAAGCTTTCGCCATGTTTATTTCCCGAGGGACATCCCGT

ACCACTTATATATTCAGGCCTTGCCATCAATGAGAGATTCATAGACTTTGCTAATGACATTTTGTCTTTC  
TACAAAGAAGAATGCTCTGGCGATACAAATAATTCATCTCATTACTAGCACAAGCGAGAGGTTCCCCA  
AAGATTAAGGTATTACGTTACGTAGTCAGGCAGTGTCTAACTGCATATGAAAGAACTTTGAGAATTTG  
TCCCCTCATAGAGAAGCCCATAAGGCGTTTCGTAATTCACAAACGGTTATTTAGCATTGCACTTGGGA  
ATGAAGAGGTATAGGCTTTCAGAGCTTGGCTAA  
//
